# Supplementary material
Source: Research Square preprint supplement (doi:10.21203/rs.3.rs-9742886/v1)
Supplement: Supplementary file 1 [file 3919cbbf76332c0288ecd367.xlsx]

## Sheet: Dataset
Case_No	Age	Gender	Nationality	Chief_Complaint	Admission_Time	Arrival_Mode	Injured_Region	Lesion_Type	Soft_Tissue_Injury	Consultation	Surgery	Hospitalized_Ward	Length_of_Stay_days	Simple_Medical_Intervention	Clinical_Outcome	Trauma_Mechanism_ICD10	Trauma_Mechanism_Detail	Pediatric	Filter
1	4	Male	Turkish citizen	Physical injury	Within first 6 hours	Walk-in	Multiple regions	Tenderness	Yes	None	No	None	0	Manageable	Left against medical advice	W18 (Same-level fall)	W18 - Aynı seviyeden düşme, diğer, tanımlanmamış, kliniği izinsiz terk	Yes (≤18)	Not selected
2	1	Female	Turkish citizen	Physical injury	Within first 6 hours	Walk-in	Head-neck	Tenderness	Yes	None	No	None	0	Manageable	Left against medical advice	W18 (Same-level fall)	W18 - Aynı seviyeden düşme, diğer, tanımlanmamış, kliniği izinsiz terk	Yes (≤18)	Not selected
3	28	Male	Turkish citizen	Physical injury	Within first 6 hours	Walk-in	Lower extremity	Tenderness	Yes	None	No	None	0	Manageable	Discharged	W18 (Same-level fall)	W18 - Aynı seviyeden düşme, diğer, tanımlanmamış, sağ ayak bileğinde hassasiyet	No (>18)	Not selected
4	25	Male	Turkish citizen	Physical injury	Within first 6 hours	Walk-in	Lower extremity	Fracture	No	Orthopedics	Yes	Orthopedics	6	Not manageable	Hospitalized	Y30 (Fall/jump from height)	Y30 - Yüksek bir yerden düşme, atlama veya itilme, 1. Kattan atlama, sol femur intertrokanterik frx	No (>18)	Not selected
5	28	Male	Turkish citizen	Physical injury	Within first 6 hours	Walk-in	Upper extremity	Fracture	No	Orthopedics	Yes	Orthopedics	3	Not manageable	Hospitalized	W10 (Fall on stairs/steps)	W10 - Merdiven ve basamaklardan düşme, sağ olecranon frx	No (>18)	Not selected
6	18	Male	Turkish citizen	Physical injury	Within first 6 hours	Walk-in	Head-neck	Fracture	No	PRC	Yes	General Surgery	3	Not manageable	Transferred to another facility	Y30 (Fall/jump from height)	Y30 - Yüksek bir yerden düşme, atlama veya itilme, sol mandibula frx, sağ maxilla arka duvar frx, çam sakuraya kendi isteğiyle gitmiş	No (>18)	Not selected
7	23	Male	Turkish citizen	Physical injury	Within first 6 hours	Ambulance	Spinal vertebra	Fracture	No	Neurosurgery	No	None	0	Not manageable	Discharged	W10 (Fall on stairs/steps)	W10 - Merdiven ve basamaklardan düşme, L3 vertebra frx, torakolomber korse ile taburcu	No (>18)	Not selected
8	20	Male	Turkish citizen	Physical injury	After 6 hours	Ambulance	Lower extremity	Fracture	No	Orthopedics	Yes	Orthopedics	3	Not manageable	Hospitalized	W10 (Fall on stairs/steps)	W10 - Merdiven ve basamaklardan düşme, sağ ayak bileği trimalleor frx	No (>18)	Selected
9	53	Male	Turkish citizen	Physical injury	Within first 6 hours	Ambulance	Spinal vertebra	Fracture	No	Neurosurgery	No	None	0	Not manageable	Discharged	W10 (Fall on stairs/steps)	W10 - Merdiven ve basamaklardan düşme, L1 vertebra non deplase frx, torakolomber korse ile taburcu	No (>18)	Not selected
10	21	Female	Turkish citizen	Physical injury	Within first 6 hours	Ambulance	Abdomen-pelvis	Tenderness	Yes	Obstetrics-Gynecology	No	None	0	Manageable	Discharged	Y30 (Fall/jump from height)	Y30 - Yüksek bir yerden düşme, atlama veya itilme, 1 metre yüksekten düşme, 16 Haftalık gebe, pelvik bölgede hassasiyet	No (>18)	Not selected
11	36	Male	Turkish citizen	Physical injury	Within first 6 hours	Walk-in	Lower extremity	Fracture	No	Orthopedics	No	None	0	Not manageable	Discharged	Y30 (Fall/jump from height)	Y30 - Yüksek bir yerden düşme, atlama veya itilme, sol calcaneus frx, alçıya alındı	No (>18)	Not selected
12	33	Male	Turkish citizen	Physical injury	Within first 6 hours	Walk-in	Lower extremity	Tenderness	Yes	None	No	None	0	Manageable	Discharged	Y30 (Fall/jump from height)	Y30 -Yüksek bir yerden düşme, atlama veya itilme, her iki ayak hassasiyet	No (>18)	Not selected
13	37	Female	Turkish citizen	Physical injury	After 6 hours	Ambulance	Spinal vertebra	Fracture	No	Neurosurgery	No	None	0	Not manageable	Discharged	W10 (Fall on stairs/steps)	W10 - Merdiven ve basamaklardan düşme, T11 ve T12 vertebra frx, torakolomber korse ile taburcu	No (>18)	Selected
14	35	Male	Turkish citizen	Physical injury	Within first 6 hours	Walk-in	Lower extremity	Tenderness	Yes	None	No	None	0	Manageable	Discharged	W10 (Fall on stairs/steps)	W10 - Merdiven ve basamaklardan düşme, sağ ayak bileği hassasiyet	No (>18)	Not selected
15	26	Male	Turkish citizen	Physical injury	Within first 6 hours	Walk-in	Lower extremity	Tenderness	Yes	None	No	None	0	Manageable	Discharged	W22 (Struck by object)	W22 - Cisimlere çarpma veya onlarla diğer çarpışma, sağ ayak bileği hassasiyet	No (>18)	Not selected
16	27	Male	Foreign national	Physical injury	Within first 6 hours	Walk-in	Lower extremity	Tenderness	Yes	None	No	None	0	Manageable	Discharged	W10 (Fall on stairs/steps)	W10 - Merdiven ve basamaklardan düşme, sol ayak bileği hassasiyet	No (>18)	Not selected
17	47	Male	Turkish citizen	Physical injury	Within first 6 hours	Walk-in	Lower extremity	Tenderness	Yes	None	No	None	0	Manageable	Discharged	W10 (Fall on stairs/steps)	W10 - Merdiven ve basamaklardan düşme, sol ayak hassasiyet	No (>18)	Not selected
18	12	Female	Turkish citizen	Physical injury	Within first 6 hours	Walk-in	Lower extremity	Tenderness	Yes	None	No	None	0	Manageable	Discharged	W10 (Fall on stairs/steps)	W10 - Merdiven ve basamaklardan düşme, sağ ayak bileği hassasiyet	Yes (≤18)	Not selected
19	15	Male	Turkish citizen	Physical injury	Within first 6 hours	Walk-in	Lower extremity	Tenderness	Yes	None	No	None	0	Manageable	Discharged	W18 (Same-level fall)	W18 - Aynı seviyeden düşme, diğer, tanımlanmamış, sağ ayak hassasiyet	Yes (≤18)	Not selected
20	32	Male	Foreign national	Physical injury	Within first 6 hours	Walk-in	Lower extremity	Tenderness	Yes	None	No	None	0	Manageable	Discharged	W22 (Struck by object)	W22 - Cisimlere çarpma veya onlarla diğer çarpışma, sağ ayak hassasiyet	No (>18)	Not selected
21	14	Male	Turkish citizen	Physical injury	Within first 6 hours	Walk-in	Upper extremity	Tenderness	Yes	None	No	None	0	Manageable	Discharged	W18 (Same-level fall)	W18- Aynı seviyeden düşme, diğer, tanımlanmamış, her iki el bileğinde hassasiyet	Yes (≤18)	Not selected
22	15	Female	Turkish citizen	Physical injury	Within first 6 hours	Walk-in	Lower extremity	Fracture	No	Orthopedics	No	None	0	Not manageable	Discharged	W10 (Fall on stairs/steps)	W10 - Merdiven ve basamaklardan düşme, sağ ayak 5. metatars frx, alçıya alınmış	Yes (≤18)	Not selected
23	34	Female	Turkish citizen	Physical injury	Within first 6 hours	Walk-in	Upper extremity	Tenderness	Yes	Orthopedics	No	None	0	Manageable	Discharged	W22 (Struck by object)	W22 - Cisimlere çarpma veya onlarla diğer çarpışma, sol el bileği hassasiyeti	No (>18)	Not selected
24	38	Male	Turkish citizen	Physical injury	Within first 6 hours	Walk-in	Lower extremity	Fracture	No	Orthopedics	Yes	Orthopedics	6	Not manageable	Hospitalized	Y30 (Fall/jump from height)	Y30 - Yüksek bir yerden düşme, atlama veya itilme, sol aşil tendon rüptürü	No (>18)	Not selected
25	52	Female	Turkish citizen	Physical injury	Within first 6 hours	Walk-in	Upper extremity	Tenderness	Yes	None	No	None	0	Manageable	Discharged	W18 (Same-level fall)	W18 - Aynı seviyeden düşme, diğer, tanımlanmamış, sağ omuz hassasiyet	No (>18)	Not selected
26	47	Male	Foreign national	Physical injury	Within first 6 hours	Walk-in	Lower extremity	Tenderness	Yes	None	No	None	0	Manageable	Discharged	W10 (Fall on stairs/steps)	W10 - Merdiven ve basamaklardan düşme, sağ ayak hassasiyet	No (>18)	Not selected
27	42	Female	Turkish citizen	Physical injury	After 6 hours	Walk-in	Upper extremity	Fracture	No	Orthopedics	No	None	0	Not manageable	Discharged	W18 (Same-level fall)	W18 - Aynı seviyeden düşme, diğer, tanımlanmamış, sol radius distal uç frx	No (>18)	Selected
28	38	Male	Turkish citizen	Physical injury	Within first 6 hours	Walk-in	Lower extremity	Fracture	No	Orthopedics	No	None	0	Not manageable	Discharged	W10 (Fall on stairs/steps)	W10 - Merdiven ve basamaklardan düşme, sağ ayak 5. proximal metatars frx	No (>18)	Not selected
29	49	Male	Foreign national	Physical injury	Within first 6 hours	Walk-in	Upper extremity	Fracture	No	Orthopedics	No	None	0	Not manageable	Discharged	W18 (Same-level fall)	W18 - Aynı seviyeden düşme, diğer, tanımlanmamış, sol radius distal uç frx	No (>18)	Not selected
30	27	Male	Foreign national	Physical injury	After 6 hours	Walk-in	Lower extremity	Tenderness	Yes	None	No	None	0	Manageable	Discharged	W18 (Same-level fall)	W18 - Aynı seviyeden düşme, diğer, tanımlanmamış, sağ ayak hassasiyet	No (>18)	Selected
31	25	Male	Turkish citizen	Physical injury	After 6 hours	Walk-in	Lower extremity	Tenderness	Yes	None	No	None	0	Manageable	Discharged	W18 (Same-level fall)	W18 - Aynı seviyeden düşme, diğer, tanımlanmamış, sol ayak bileği hassasiyet	No (>18)	Selected
32	51	Female	Turkish citizen	Physical injury	Within first 6 hours	Ambulance	Lower extremity	Fracture	No	Orthopedics	No	None	0	Not manageable	Discharged	W10 (Fall on stairs/steps)	W10 - Merdiven ve basamaklardan düşme, sağ ayak 5. metatars frx	No (>18)	Not selected
33	49	Male	Turkish citizen	Physical injury	After 6 hours	Ambulance	Lower extremity	Fracture	No	Orthopedics	Yes	Orthopedics	3	Not manageable	Hospitalized	W10 (Fall on stairs/steps)	W10 - Merdiven ve basamaklardan düşme, sağ aşil tendon rüptürü	No (>18)	Selected
34	36	Female	Turkish citizen	Physical injury	After 6 hours	Ambulance	Abdomen-pelvis	Tenderness	Yes	Orthopedics	No	None	0	Manageable	Discharged	W10 (Fall on stairs/steps)	W10 - Merdiven ve basamaklardan düşme, koksis hassasiyeti	No (>18)	Selected
35	32	Female	Turkish citizen	Physical injury	After 6 hours	Walk-in	Lower extremity	Tenderness	Yes	None	No	None	0	Manageable	Discharged	W10 (Fall on stairs/steps)	W10 - Merdiven ve basamaklardan düşme, her iki ayakta hassasiyet	No (>18)	Selected
36	37	Female	Turkish citizen	Physical injury	After 6 hours	Walk-in	Lower extremity	Fracture	No	Orthopedics	Yes	Orthopedics	2	Not manageable	Hospitalized	Y30 (Fall/jump from height)	Y30 - Yüksek bir yerden düşme, atlama veya itilme, sağ kalkaneus frx	No (>18)	Selected
37	21	Female	Turkish citizen	Physical injury	After 6 hours	Walk-in	Upper extremity	Fracture	No	Orthopedics	No	Orthopedics	1	Not manageable	Hospitalized	W23 (Caught between objects)	W23 - Cisimler arasında sıkıştırılma, yakalanma, ezilme, basılma, sağ el 1. parmak pif frx	No (>18)	Selected
38	38	Male	Turkish citizen	Physical injury	After 6 hours	Walk-in	Lower extremity	Fracture	No	Orthopedics	No	None	0	Not manageable	Discharged	W10 (Fall on stairs/steps)	W10 - Merdiven ve basamaklardan düşme, sağ fibula distal uç frx, alçı atel	No (>18)	Selected
39	55	Female	Turkish citizen	Physical injury	After 6 hours	Walk-in	Lower extremity	Fracture	No	Orthopedics	No	None	0	Not manageable	Discharged	W10 (Fall on stairs/steps)	W10 - Merdiven ve basamaklardan düşme, sol fibula distal uç frx, alçı atel	No (>18)	Selected
40	50	Male	Turkish citizen	Physical injury	After 6 hours	Walk-in	Lower extremity	Tenderness	Yes	None	No	None	0	Manageable	Discharged	W18 (Same-level fall)	W18 - Aynı seviyeden düşme, diğer, tanımlanmamış, sol ayak bileği burkulması	No (>18)	Selected
41	26	Female	Turkish citizen	Physical injury	After 6 hours	Walk-in	Lower extremity	Tenderness	Yes	None	No	None	0	Manageable	Discharged	W18 (Same-level fall)	W18 - Aynı seviyeden düşme, diğer, tanımlanmamış, sağ ayak bileği hassasiyet	No (>18)	Selected
42	22	Female	Turkish citizen	Physical injury	After 6 hours	Walk-in	Lower extremity	Tenderness	Yes	None	No	None	0	Manageable	Discharged	W18 (Same-level fall)	W18 - Aynı seviyeden düşme, diğer, tanımlanmamış, sağ ayak bileği hassasiyet	No (>18)	Selected
43	34	Female	Turkish citizen	Physical injury	After 6 hours	Walk-in	Lower extremity	Tenderness	Yes	None	No	None	0	Manageable	Discharged	W18 (Same-level fall)	W18 - Aynı seviyeden düşme, diğer, tanımlanmamış, sağ ayak bileği hassasiyet	No (>18)	Selected
44	4	Male	Turkish citizen	Physical injury	After 6 hours	Walk-in	Upper extremity	Tenderness	Yes	None	No	None	0	Manageable	Discharged	W18 (Same-level fall)	W18 - Aynı seviyeden düşme, diğer, tanımlanmamış, sağ dirsek hassasiyet	Yes (≤18)	Selected
45	19	Female	Turkish citizen	Physical injury	Within first 6 hours	Walk-in	Lower extremity	Tenderness	Yes	None	No	None	0	Manageable	Discharged	W18 (Same-level fall)	W18 - Aynı seviyeden düşme, diğer, tanımlanmamış, sol ayak bileği hassasiyet	No (>18)	Not selected
46	17	Female	Turkish citizen	Physical injury	After 6 hours	Walk-in	Upper extremity	Fracture	No	Orthopedics	No	None	0	Not manageable	Discharged	W23 (Caught between objects)	W23 - Cisimler arasında sıkıştırılma, yakalanma, ezilme, basılma, sol el 3. parmak distal falanx frx	Yes (≤18)	Selected
47	44	Male	Turkish citizen	Physical injury	After 6 hours	Walk-in	Upper extremity	Tenderness	Yes	None	No	None	0	Manageable	Discharged	W18 (Same-level fall)	W18 - Aynı seviyeden düşme, diğer, tanımlanmamış, her iki el bileğinde hassasiyet	No (>18)	Selected
48	43	Female	Turkish citizen	Physical injury	After 6 hours	Walk-in	Lower extremity	Fracture	No	Orthopedics	No	None	0	Not manageable	Discharged	W10 (Fall on stairs/steps)	W10 - Merdiven ve basamaklardan düşme, sol fibula distal uç frx	No (>18)	Selected
49	40	Female	Foreign national	Physical injury	After 6 hours	Walk-in	Lower extremity	Tenderness	Yes	None	No	None	0	Manageable	Discharged	W10 (Fall on stairs/steps)	W10 - Merdiven ve basamaklardan düşme, sağ ayak bileği hassasiyet	No (>18)	Selected
50	41	Female	Turkish citizen	Physical injury	After 6 hours	Walk-in	Lower extremity	Fracture	No	Orthopedics	No	None	0	Not manageable	Discharged	W10 (Fall on stairs/steps)	W10 - Merdiven ve basamaklardan düşme, sağ ayak 1 .distal metatars frx, alçı atel	No (>18)	Selected
51	27	Male	Turkish citizen	Physical injury	After 6 hours	Walk-in	Upper extremity	Fracture	No	Orthopedics	No	None	0	Not manageable	Discharged	W18 (Same-level fall)	W18 - Aynı seviyeden düşme, diğer, tanımlanmamış, sol el 5. parmak distal falanks frx, alçı atel	No (>18)	Selected
52	26	Female	Turkish citizen	Physical injury	After 6 hours	Walk-in	Lower extremity	Tenderness	Yes	None	No	None	0	Manageable	Discharged	W18 (Same-level fall)	W18 - Aynı seviyeden düşme, diğer, tanımlanmamış, sol ayak bileği hassasiyet	No (>18)	Selected
53	17	Female	Turkish citizen	Physical injury	After 6 hours	Walk-in	Lower extremity	Tenderness	Yes	None	No	None	0	Manageable	Discharged	W18 (Same-level fall)	W18 - Aynı seviyeden düşme, diğer, tanımlanmamış, sağ ayak bileği hassasiyet	Yes (≤18)	Selected
54	20	Female	Turkish citizen	Physical injury	After 6 hours	Walk-in	Lower extremity	Tenderness	Yes	None	No	None	0	Manageable	Discharged	W18 (Same-level fall)	W18 - Aynı seviyeden düşme, diğer, sol ayak bileği hassasiyet	No (>18)	Selected
55	18	Male	Turkish citizen	Physical injury	After 6 hours	Walk-in	Lower extremity	Tenderness	Yes	None	No	None	0	Manageable	Discharged	W18 (Same-level fall)	W18 - Aynı seviyeden düşme, diğer, tanımlanmamış, sağ ayak bileği hassasiyet	No (>18)	Selected
56	32	Male	Turkish citizen	Physical injury	After 6 hours	Walk-in	Head-neck	Tenderness	Yes	None	No	None	0	Manageable	Discharged	W10 (Fall on stairs/steps)	W10 - Merdiven ve basamaklardan düşme, sağ ayak bileği hassasiyet	No (>18)	Selected
57	25	Female	Turkish citizen	Physical injury	After 6 hours	Walk-in	Lower extremity	Tenderness	Yes	None	No	None	0	Manageable	Discharged	W18 (Same-level fall)	W18 - Aynı seviyeden düşme, diğer, tanımlanmamış, sağ ayak bileği hassasiyet	No (>18)	Selected
58	46	Female	Turkish citizen	Physical injury	After 6 hours	Walk-in	Upper extremity	Tenderness	Yes	None	No	None	0	Manageable	Discharged	W18 (Same-level fall)	W18 - Aynı seviyeden düşme, diğer, tanımlanmamış, sol omuz ve kolda hassasiyet	No (>18)	Selected
59	27	Male	Foreign national	Physical injury	After 6 hours	Walk-in	Lower extremity	Tenderness	Yes	None	No	None	0	Manageable	Discharged	W18 (Same-level fall)	W18 - Aynı seviyeden düşme, diğer, sol ayak bileği hassasiyet	No (>18)	Selected
60	15	Male	Turkish citizen	Physical injury	After 6 hours	Walk-in	Upper extremity	Tenderness	Yes	None	No	None	0	Manageable	Discharged	W10 (Fall on stairs/steps)	W10 - Merdiven ve basamaklardan düşme, sol dirsekte hassasiyet	Yes (≤18)	Selected
61	21	Female	Turkish citizen	Physical injury	After 6 hours	Walk-in	Lower extremity	Tenderness	Yes	None	No	None	0	Manageable	Discharged	W22 (Struck by object)	W22 - Cisimlere çarpma veya onlarla diğer çarpışma, sağ ayak hassasiyet	No (>18)	Selected
62	30	Male	Foreign national	Physical injury	After 6 hours	Ambulance	Head-neck	Dermabrasion	Yes	None	No	None	0	Manageable	Discharged	W18 (Same-level fall)	W18 - Aynı seviyeden düşme, diğer, deprem sonrası nöbet geçirmiş kafasını vurmuş	No (>18)	Selected
63	41	Male	Turkish citizen	Physical injury	Within first 6 hours	Walk-in	Lower extremity	Fracture	No	Orthopedics	Yes	Orthopedics	1	Not manageable	Hospitalized	W10 (Fall on stairs/steps)	W10 - Merdiven ve basamaklardan düşme, her iki ayak kalkaneus frx	No (>18)	Not selected
64	29	Male	Turkish citizen	Physical injury	Within first 6 hours	Walk-in	Lower extremity	Fracture	No	Orthopedics	Yes	Orthopedics	2	Not manageable	Hospitalized	W10 (Fall on stairs/steps)	W10 - Merdiven ve basamaklardan düşme, tanımlanmamış, sol patella frx	No (>18)	Not selected
65	23	Female	Turkish citizen	Physical injury	Within first 6 hours	Walk-in	Lower extremity	Fracture	No	Orthopedics	Yes	Orthopedics	2	Not manageable	Hospitalized	Y30 (Fall/jump from height)	Y30 - Yüksek bir yerden düşme, atlama veya itilme, sağ bimalleol frx	No (>18)	Not selected
66	57	Female	Turkish citizen	Physical injury	Within first 6 hours	Walk-in	Lower extremity	Fracture	No	Orthopedics	Yes	Orthopedics	32	Not manageable	Hospitalized	W18 (Same-level fall)	W18 - Aynı seviyeden düşme, diğer, tanımlanmamış, sol femur intertrokanterik frx	No (>18)	Not selected

## Sheet: Variable Labels
Variable	Code	Label
Gender	1	Female
Gender	2	Male
Nationality	1	Turkish citizen
Nationality	2	Foreign national
Chief_Complaint	1	Psychological symptoms
Chief_Complaint	2	Physical injury
Admission_Time	1	Within first 6 hours
Admission_Time	2	After 6 hours
Arrival_Mode	1	Walk-in
Arrival_Mode	2	Ambulance
Injured_Region	1	Head-neck
Injured_Region	2	Thorax
Injured_Region	3	Abdomen-pelvis
Injured_Region	4	Upper extremity
Injured_Region	5	Lower extremity
Injured_Region	6	Spinal vertebra
Injured_Region	7	Multiple regions
Lesion_Type	1	Tenderness
Lesion_Type	2	Erythema
Lesion_Type	3	Ecchymosis
Lesion_Type	4	Dermabrasion
Lesion_Type	5	Dislocation
Lesion_Type	6	Fracture
Lesion_Type	7	Contusion
Lesion_Type	8	Laceration
Lesion_Type	9	Other
Soft_Tissue_Injury	0	No
Soft_Tissue_Injury	1	Yes
Consultation	0	None
Consultation	1	General Surgery
Consultation	2	Orthopedics
Consultation	3	Thoracic Surgery
Consultation	4	Cardiovascular Surgery
Consultation	5	Psychiatry
Consultation	6	Neurosurgery
Consultation	7	ENT
Consultation	8	Neurology
Consultation	9	Obstetrics-Gynecology
Consultation	10	Ophthalmology
Consultation	11	PRC
Surgery	0	No
Surgery	1	Yes
Hospitalized_Ward	0	None
Hospitalized_Ward	1	General Surgery
Hospitalized_Ward	2	Orthopedics
Hospitalized_Ward	3	Thoracic Surgery
Hospitalized_Ward	4	Cardiovascular Surgery
Hospitalized_Ward	5	Psychiatry
Hospitalized_Ward	6	Neurosurgery
Hospitalized_Ward	7	ENT
Simple_Medical_Intervention	1	Manageable
Simple_Medical_Intervention	2	Not manageable
Clinical_Outcome	1	Discharged
Clinical_Outcome	2	Hospitalized
Clinical_Outcome	3	Transferred to another facility
Clinical_Outcome	5	Left against medical advice
Trauma_Mechanism_ICD10	1	W10 (Fall on stairs/steps)
Trauma_Mechanism_ICD10	2	Y30 (Fall/jump from height)
Trauma_Mechanism_ICD10	3	W22 (Struck by object)
Trauma_Mechanism_ICD10	4	W23 (Caught between objects)
Trauma_Mechanism_ICD10	5	W18 (Same-level fall)
Pediatric	1	Yes (≤18)
Pediatric	2	No (>18)
